# Supplementary material for: Iron Overload Coordinately Promotes Ferritin Expression and Fat Accumulation in Caenorhabditis elegans
Source: Oxford University Press journal article supplement (doi:10.1534/genetics.116.186742), 2016-03-27
Supplement: figures3.pdf [file figures3.pdf]

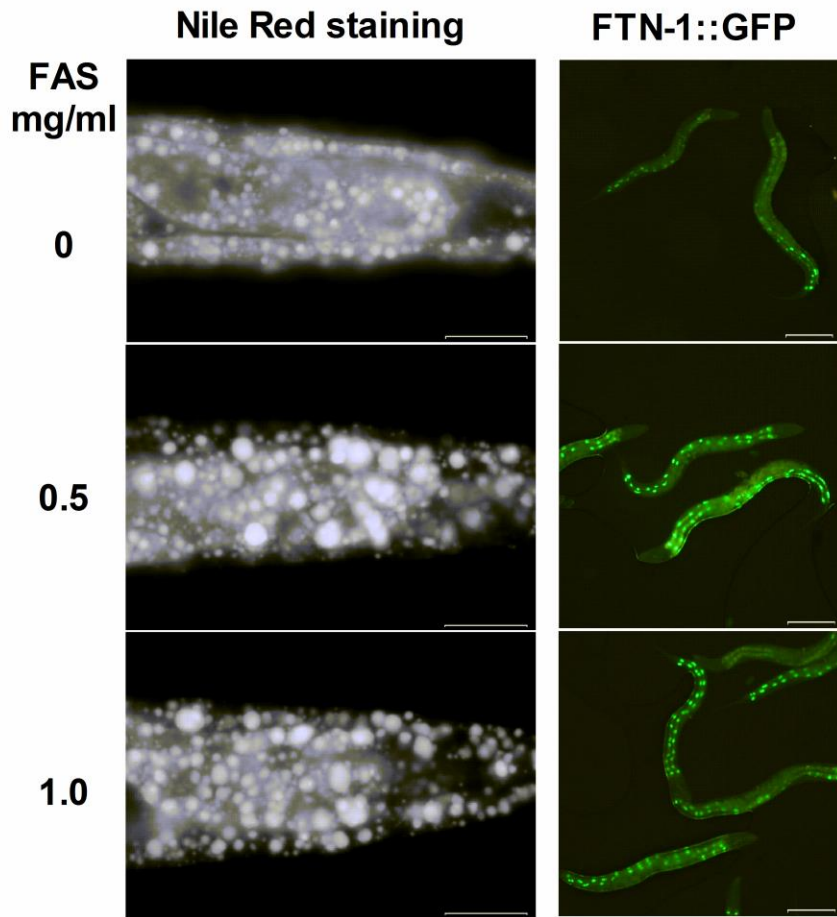

**Fig. S3. Ammonium ferric sulfate (FAS) treatment.** Left panels: Nile Red staining of fixed N2 worm treated with FAS [ $\text{NH}_4\text{Fe}(\text{SO}_4)_2 \cdot 12\text{H}_2\text{O}$ ]. Represented animals, anterior is on left, and posterior is on right. Scale bar represents 20  $\mu\text{m}$ . Exposure time: 25 ms. Right panels: Expression of FTN-1::GFP [*XA6900(ftn-1::GFP)*] under FAS condition. Scale bar represents 50  $\mu\text{m}$ . Exposure time: 140 ms.
