# Supplementary material for: Iron Overload Coordinately Promotes Ferritin Expression and Fat Accumulation in Caenorhabditis elegans
Source: Oxford University Press journal article supplement (doi:10.1534/genetics.116.186742), 2016-03-27
Supplement: figures6.pdf [file figures6.pdf]

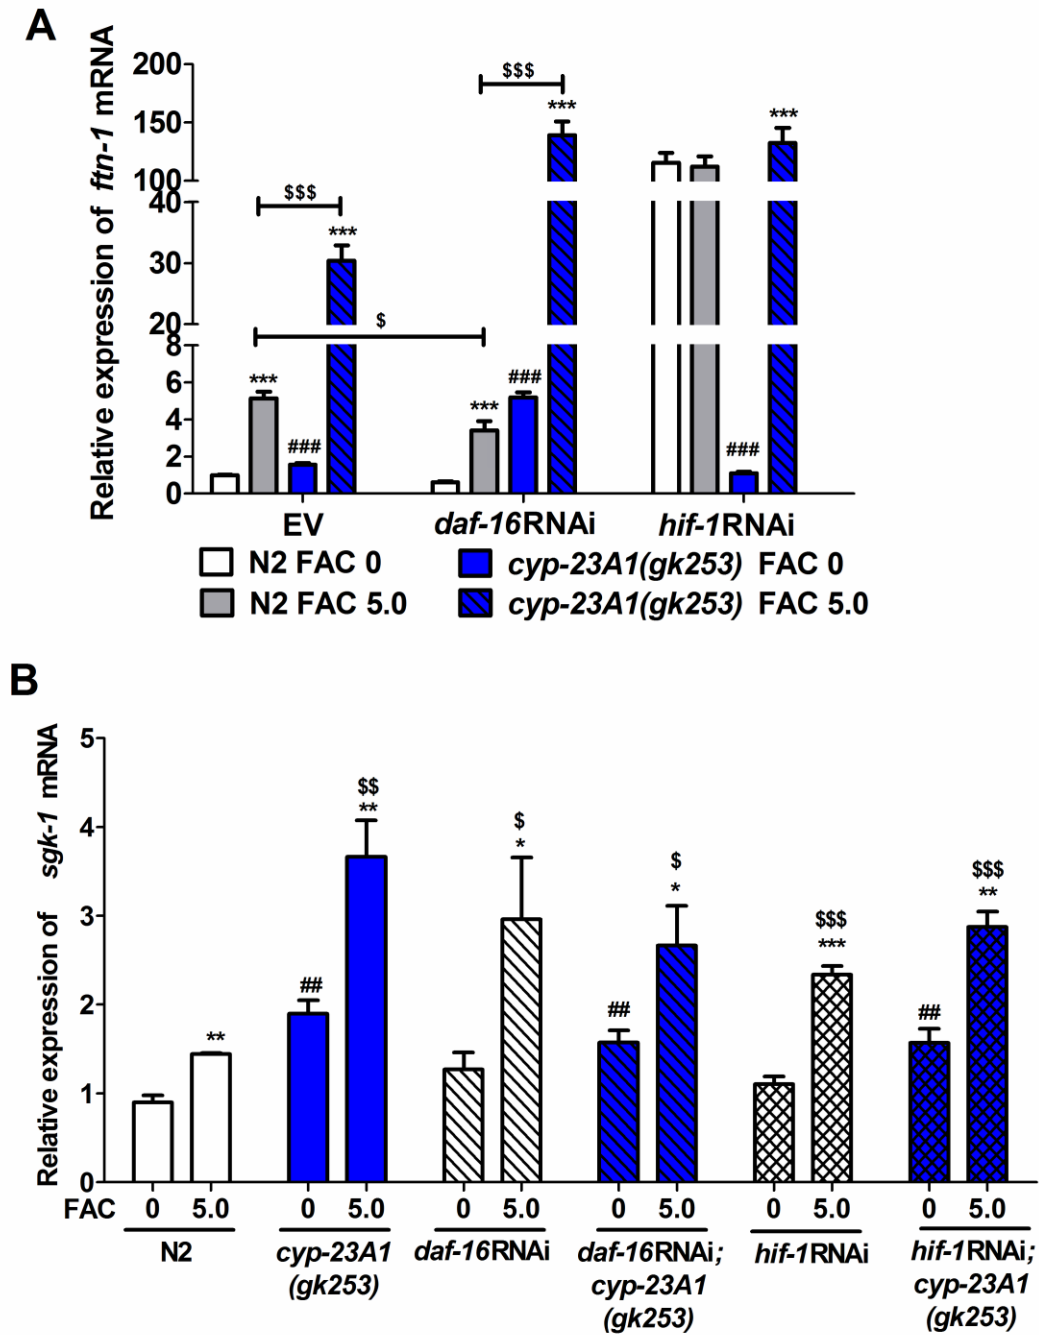

Fig. S6. The relative expression of *ftn-1* mRNA and *sgk-1* mRNA in *daf-16RNAi* and *hif-1RNAi* worms. (A) Relative expression of *ftn-1* mRNA. Data are presented as mean  $\pm$  SEM of

8 biological repeats. **(B) Relative expression of *sgk-1* mRNA.** Data are presented as mean  $\pm$  SEM of 4 biological repeats. Significant difference between FAC treatment and no FAC in same worm strain, \*:  $P<0.05$ , \*\*:  $P<0.01$ , \*\*\*:  $P<0.001$ . Significant difference between N2 and a specific worm strain under no FAC, ##:  $P<0.01$ , ###:  $P<0.001$ . Significant difference between N2 and a specific worm strain under FAC treatment, \$:  $P<0.05$ , \$\$:  $P<0.01$ , \$\$\$:  $P<0.001$ .
