# Supplementary material for: Iron Overload Coordinately Promotes Ferritin Expression and Fat Accumulation in Caenorhabditis elegans
Source: Oxford University Press journal article supplement (doi:10.1534/genetics.116.186742), 2016-03-27
Supplement: figures7.pdf [file figures7.pdf]

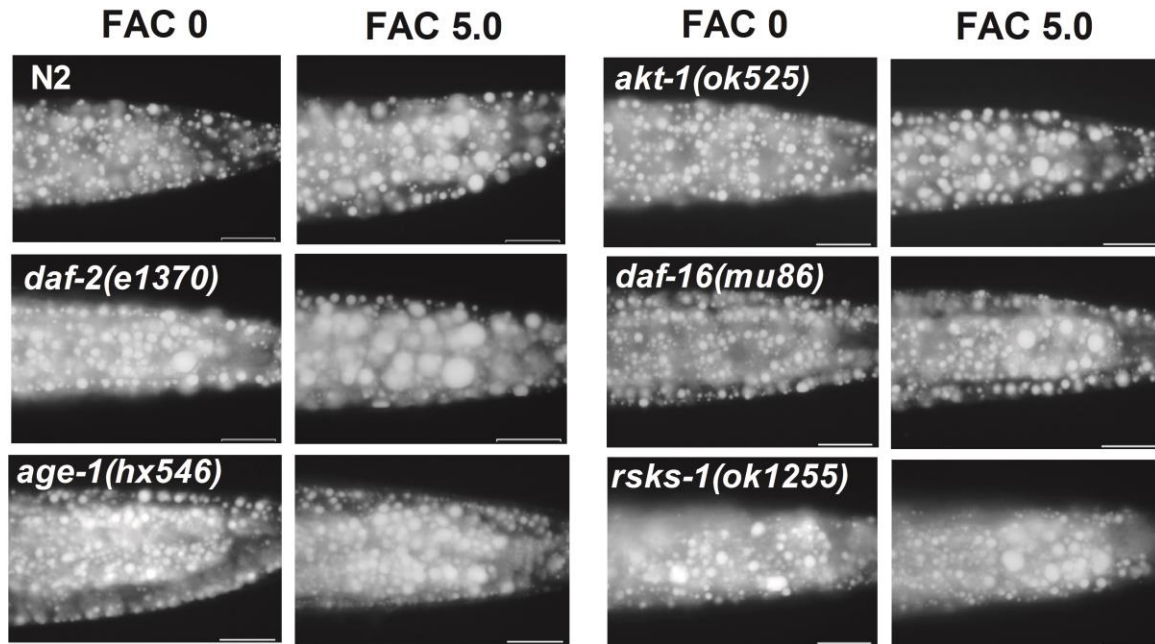

**Fig. S7. FAC treatment on genes involved in insulin/IGF-1 or target of rapamycin (TOR) signaling pathways.** Nile Red staining of fixed mutant worms. Represented animals, anterior is on left, and posterior is on right. Scale bar represents 20  $\mu$ m. Exposure time: 25 ms.
