# Supplementary material for: Iron Overload Coordinately Promotes Ferritin Expression and Fat Accumulation in Caenorhabditis elegans
Source: Oxford University Press journal article supplement (doi:10.1534/genetics.116.186742), 2016-03-27
Supplement: figures8.pdf [file figures8.pdf]

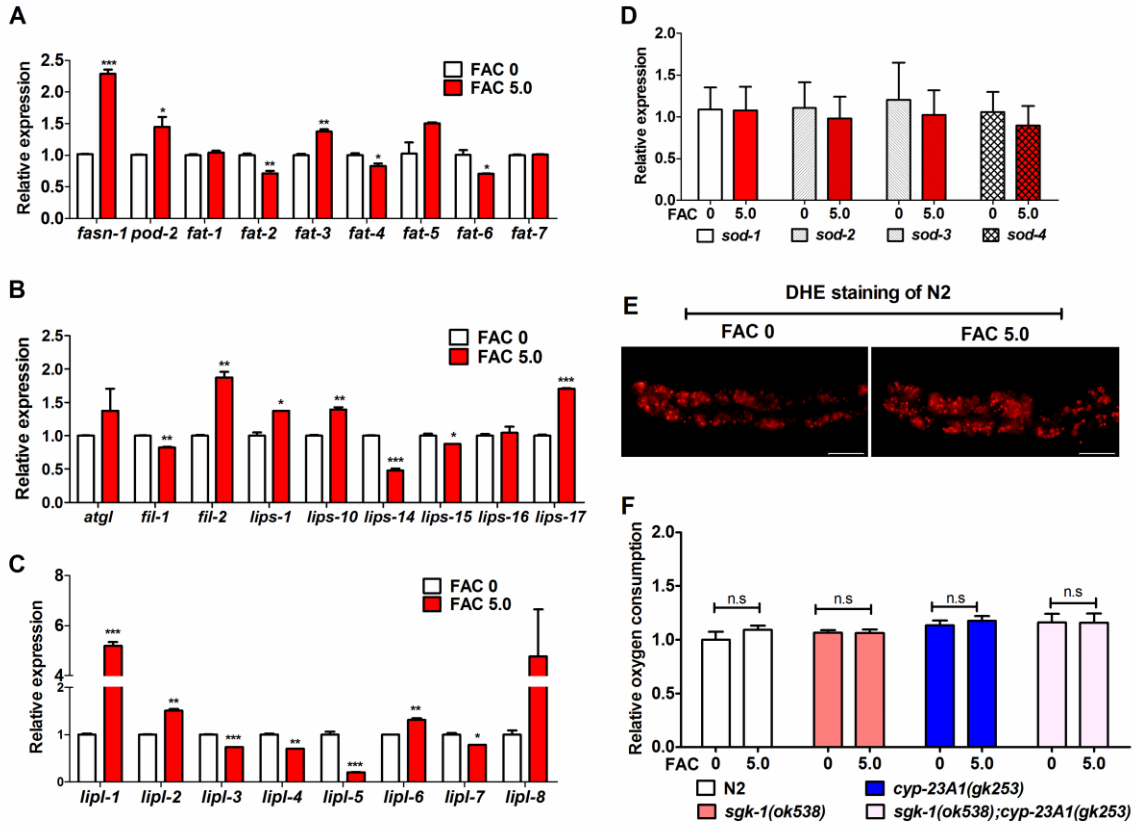

**Fig. S8. The expression of lipid metabolic genes and mitochondria function.** The relative expression of genes involve into fatty acids synthesis (A) and lipolysis (B and C) in N2 worms under iron overload condition. (D) The relative expression of *sod-1*, *sod-2*, *sod-3* and *sod-4* in N2 worms under FAC treatments. (E) Dihydroethidium (DHE) staining of N2 worms under FAC treatments. Represented animals, anterior is on left, and posterior is on right. Scale bar represents 20  $\mu$ m. Exposure time: 150 ms. (F) Relative oxygen consumption in N2, *sgk-1(ok538)*, *cyp-23A1(gk253)*, *sgk-1(ok538);cyp-23A1(gk253)* worms. Data are presented as mean  $\pm$  SEM of 3 biological repeats. Significant difference between FAC 5.0 mg/ml and FAC 0 mg/ml in same worm strain, \*:  $P < 0.05$ , \*\*:  $P < 0.01$ , \*\*\*:  $P < 0.001$ . n.s, no significance.
