# Supplementary material for: Iron Overload Coordinately Promotes Ferritin Expression and Fat Accumulation in Caenorhabditis elegans
Source: Oxford University Press journal article supplement (doi:10.1534/genetics.116.186742), 2016-03-27
Supplement: figures9.pdf [file figures9.pdf]

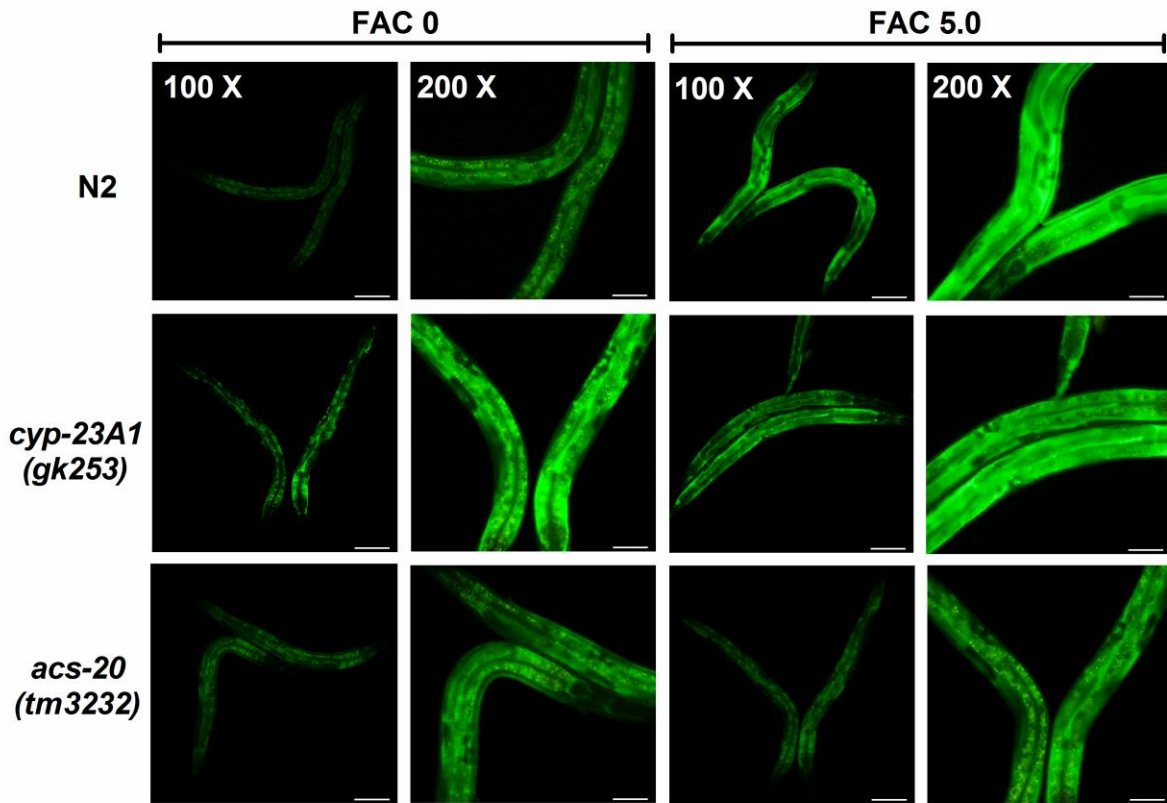

**Fig. S9.** The expression of VIT-2::GFP in N2, *cyp-23A1(gk253)*, and *acs-20(tm3232)* worms. Represented animals. Scale bar represents 100  $\mu$ m. Exposure time: 334 ms. 100 X is 100 magnifications, and 200 X is 200 magnifications.
